# Supplementary material for: Crustal structures beneath the Eastern and Southern Alps fromambient noise tomography
Source: Copernicus journal article supplement (doi:10.5194/se-2019-177), 2020-01-16
Supplement: Supplementary file 3 [file se-2019-177-supplement.zip]

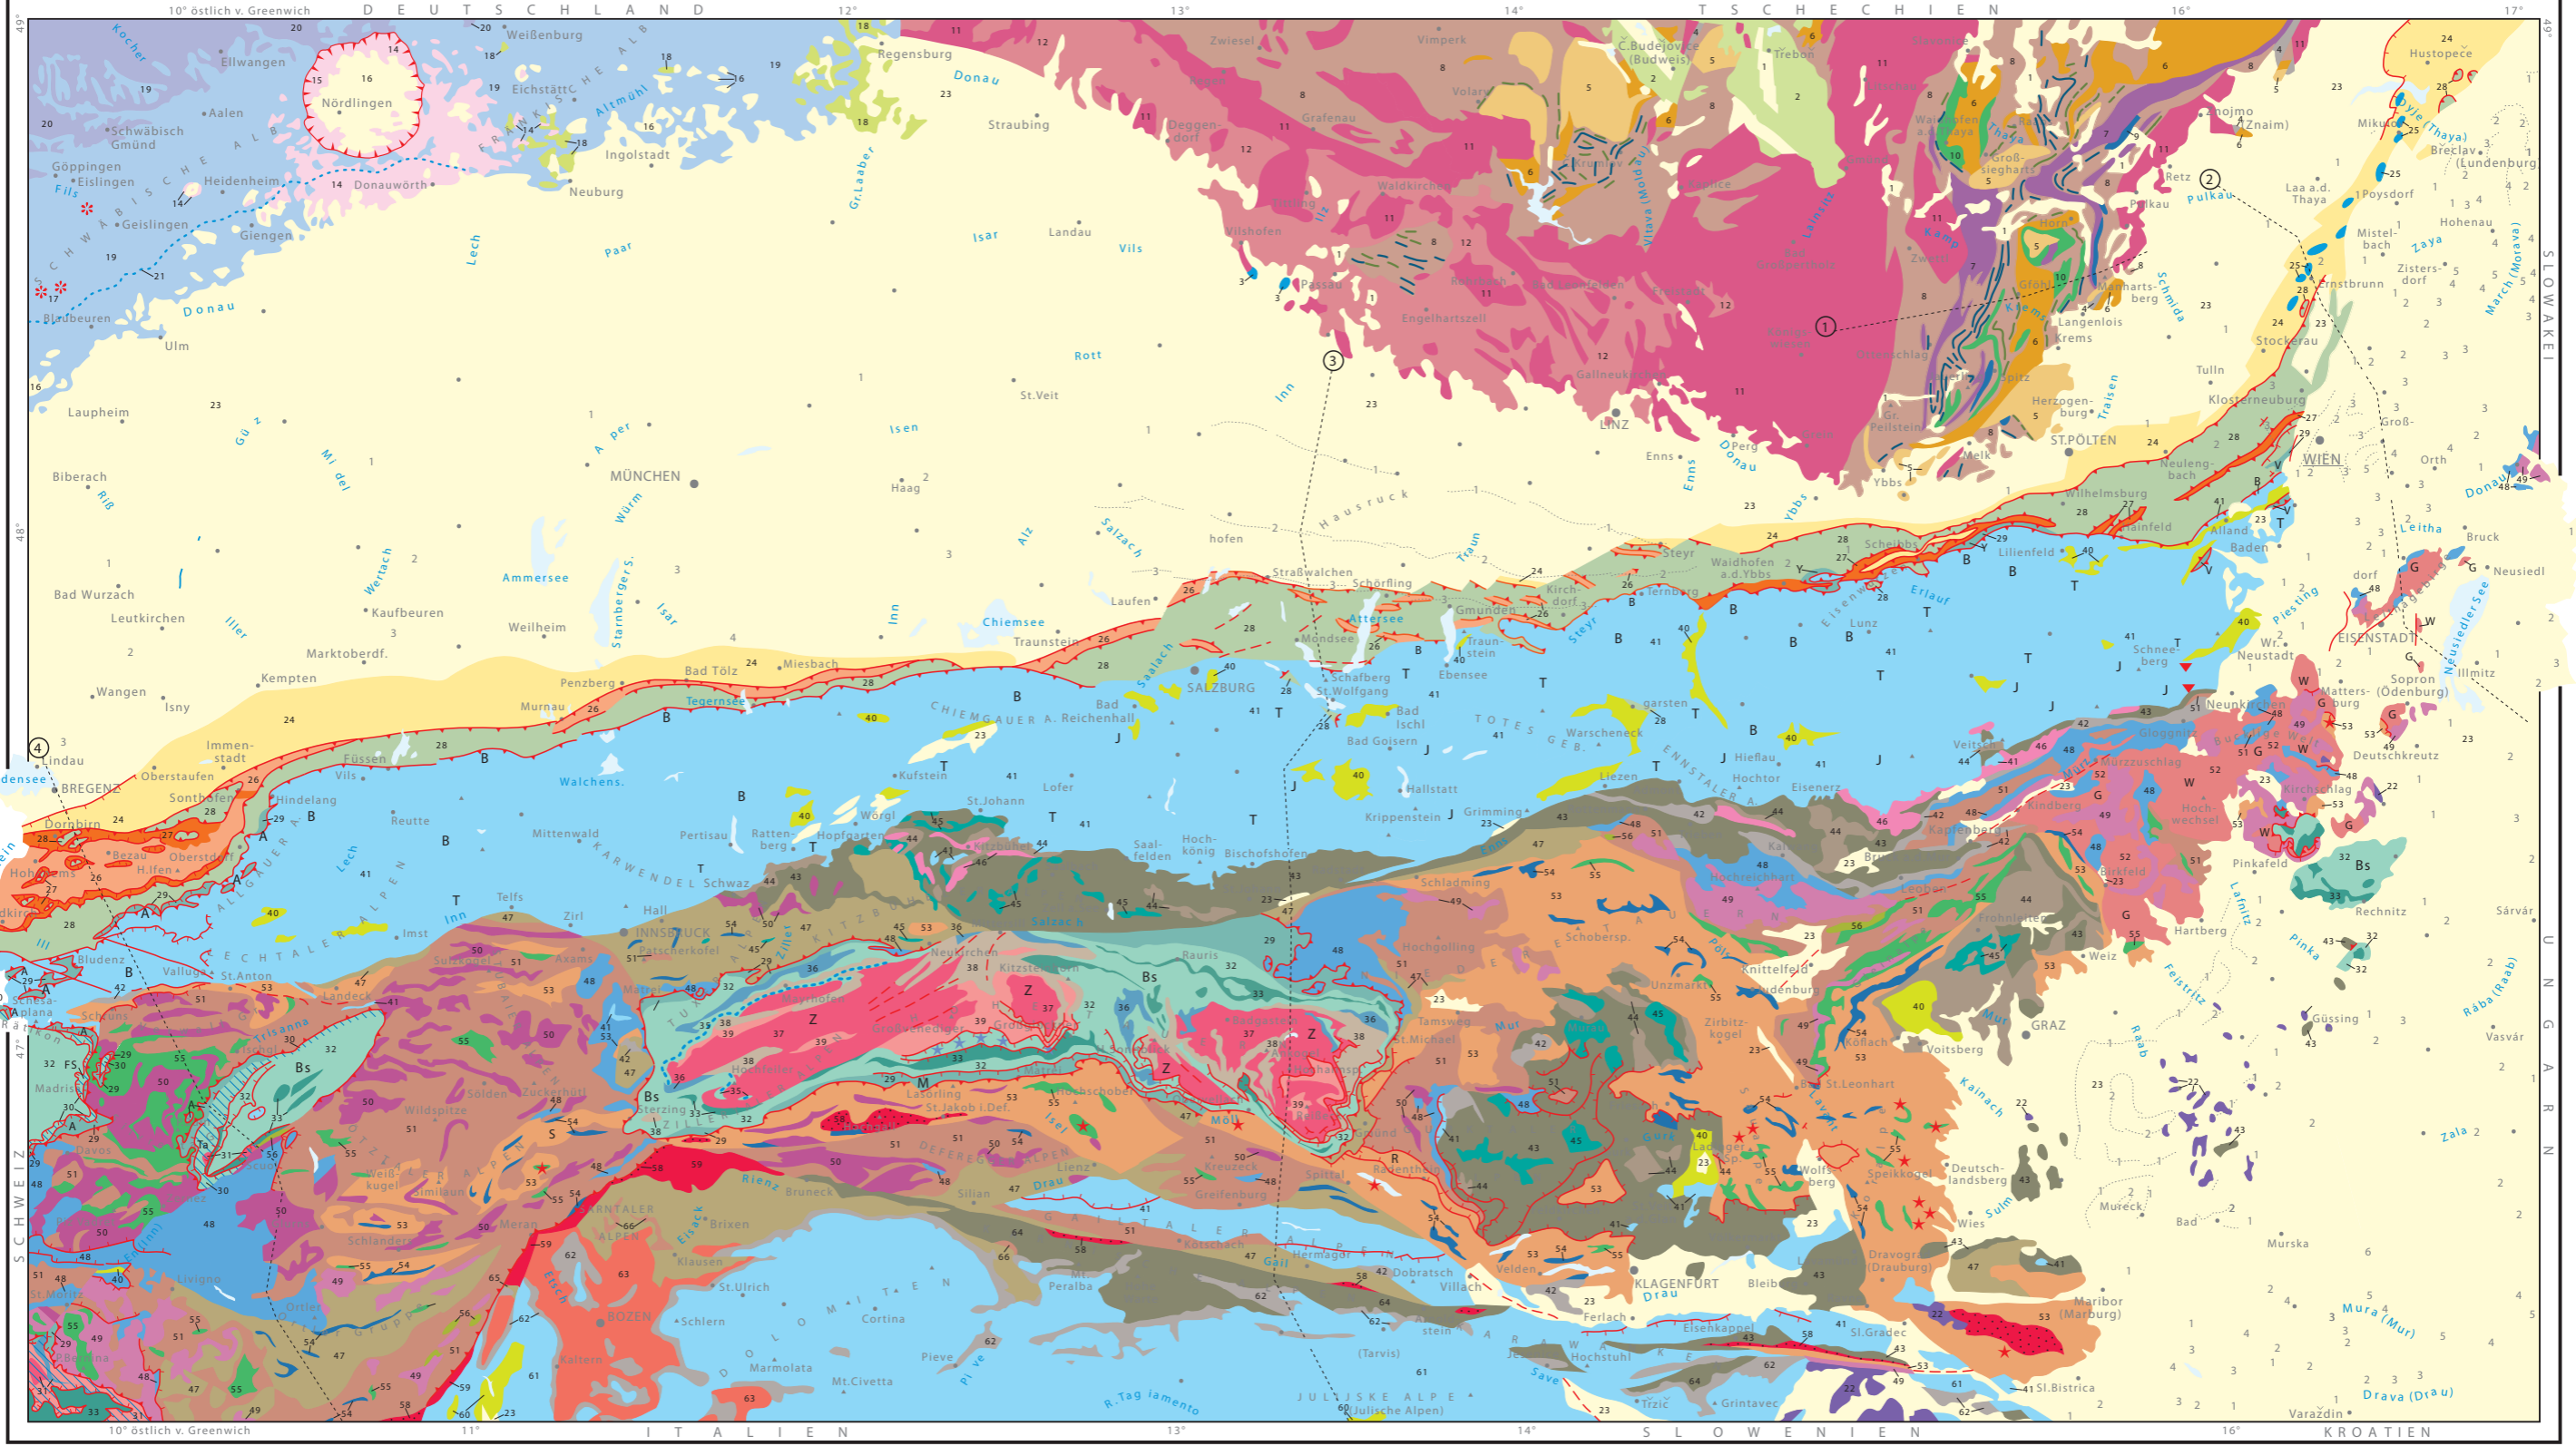

 Erhältlich im Verlag der Geologischen Bundesanstalt, Rasumofskygasse 23, A-1031 Wien.  
© Geologische Bundesanstalt  
Strukturelemente des Beckenuntergrundes im Bereich Sloweniens und Kroatiens unter Verwendung der  
Kompilation von M. POLJAK, mit Genehmigung des Institutes für Geologie, Geotechnik und Geophysik, Ljubljana.

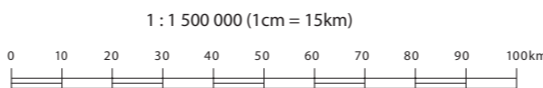

Graphische Gestaltung und Ausführung: M. BRÜGGEMANN-LEDOLTER,  
ADV-Bearbeitung: M. BRÜGGEMANN-LEDOLTER, J. RUTHNER.  
Druck: F. Dellerfuhs, Wien.
