# Supplementary material for: Crustal structures beneath the Eastern and Southern Alps fromambient noise tomography
Source: Copernicus journal article supplement (doi:10.5194/se-2019-177), 2020-01-16
Supplement: Supplementary file 4 [file se-2019-177-supplement.zip]

| Period (sec) | Rayleigh wave |          | Love wave |          |
|--------------|---------------|----------|-----------|----------|
|              | $\alpha$      | $\sigma$ | $\alpha$  | $\sigma$ |
| 1 to 5       | 28            | 22       | 28        | 20       |
| 6 to 10      | 28            | 22       | 30        | 20       |
| 11 to 20     | 28            | 24       | 30        | 24       |
| 21 to 30     | 36            | 26       | 40        | 26       |
| 31 to 50     | 36            | 26       | 40        | 26       |

**Table S1.** Values selected for damping factor ( $\alpha$ ) and correlation length ( $\sigma$ ) in km for each period range during the group velocity tomography.
