# Supplementary material for: Crustal structures beneath the Eastern and Southern Alps fromambient noise tomography
Source: Copernicus journal article supplement (doi:10.5194/se-2019-177), 2020-01-16
Supplement: Supplementary file 5 [file se-2019-177-supplement.zip]

Archive with 4 entries (4 files):
- FigureS1.pdf
- __MACOSX/._FigureS1.pdf
- TableS1.pdf
- __MACOSX/._TableS1.pdf
